# Supplementary material for: Active and passive mechanics for rugose terrain traversal in centipedes
Source: Oxford University Press journal article supplement (doi:10.1242/jeb.244688), 2023-01-19
Supplement: jeb244688supp.pdf [file jeb244688supp.pdf]

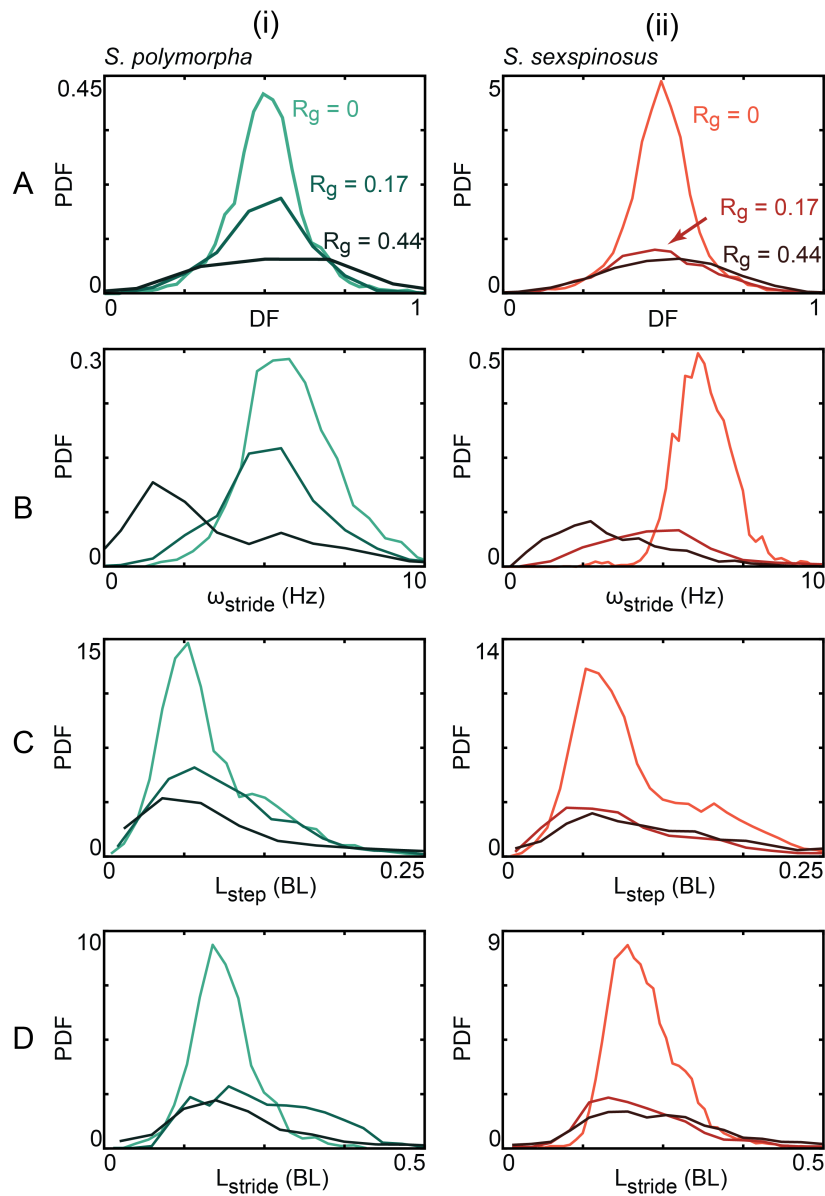

**Fig. S1. Probability distribution functions (PDF) of leg parameters.** PDF of (A) duty factor (DF), (B) stride frequency ( $\omega_{\text{stride}}$ ), (C) step length ( $L_{\text{step}}$ ), and (D) stride length ( $L_{\text{stride}}$ ), for both (i) *S. polymorpha* and (ii) *S. sexspinosus*. For *S. polymorpha*, light green, medium green, and dark green, correspond to flat ( $R_g = 0$ ), less rugose ( $R_g = 0.17$ ), and more rugose ( $R_g = 0.44$ ) terrain, respectively. For *S. sexspinosus*, light orange, medium red, and dark red, correspond to flat ( $R_g = 0$ ), less rugose ( $R_g = 0.17$ ), and more rugose ( $R_g = 0.44$ ) terrain, respectively.

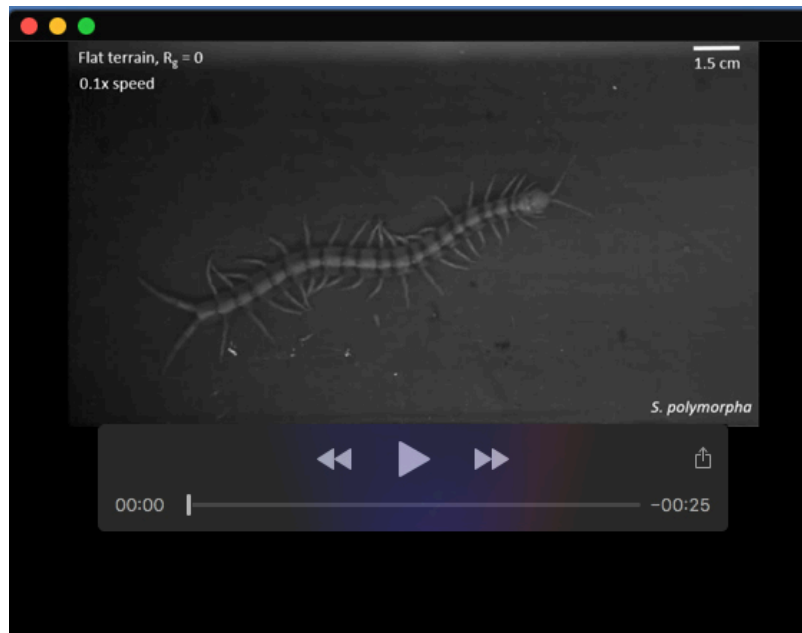

**Movie 1. *S. polymorpha* and *S. sexspinosus* locomoting on flat, less rugose, and more rugose terrain.** *S. polymorpha* locomoting on (A) flat ( $R_g = 0$ ), (B) less rugose ( $R_g = 0.17$ ), and (C) more rugose ( $R_g = 0.44$ ) terrain. *S. sexspinosus* locomoting on (A) flat ( $R_g = 0$ ), (B-D) less rugose ( $R_g = 0.17$ ), and (E) more rugose ( $R_g = 0.44$ ) terrain. All videos playback at real-time and 0.1x speed.

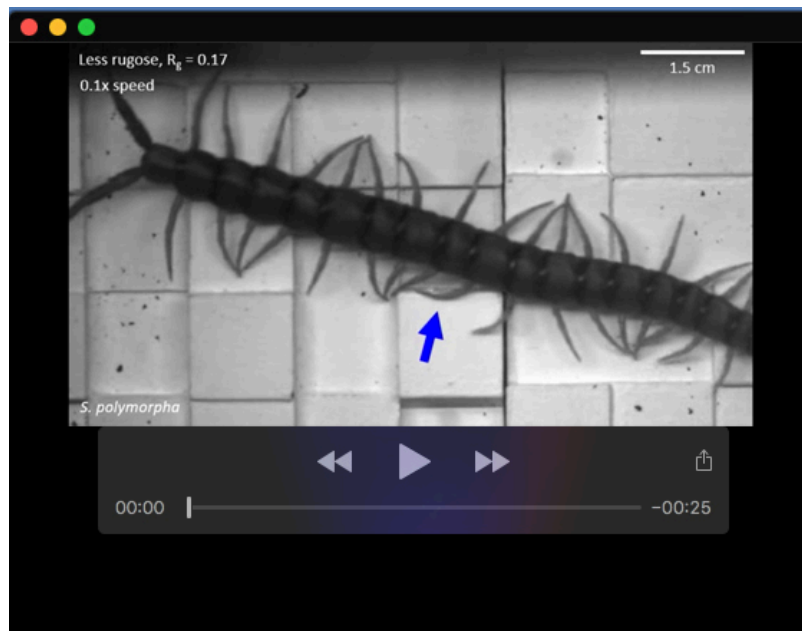

**Movie 2. Passive limb behavior in *S. polymorpha* and *S. sexspinosus*.** Passive limb behavior observed in *S. polymorpha* on (A) less rugose ( $R_g = 0.17$ ) and (B) more rugose ( $R_g = 0.44$ ) terrain. Passive limb behavior observed in *S. sexspinosus* on (A) less rugose ( $R_g = 0.17$ ) and (B) more rugose ( $R_g = 0.44$ ) terrain. All videos playback at 0.1x speed.

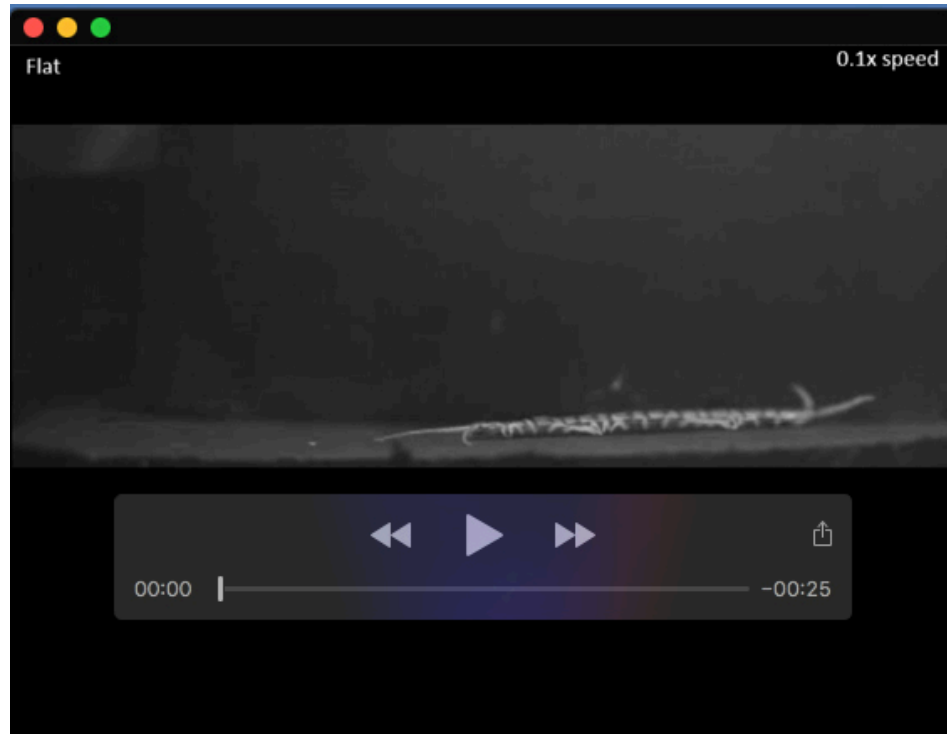

**Movie 3. Vertical body lifting.** (A) Side view of *S. polymorpha* locomoting on flat terrain. (B) Side view of *S. polymorpha* locomoting on less rugose ( $R_g = 0.17$ ) terrain. All videos playback at real-time and 0.1x speed.
